# Supplementary material
Source: PubMed Central journal article supplement (PMC4964902)
Supplement: ml5003635_si_001.pdf [file ml5003635_si_001.pdf]

## Supporting Information

### DESIGN AND SYNTHESIS OF A MITOCHONDRIA-TARGETED MIMIC OF GLUTATHIONE PEROXIDASE, MITOEBSELEN-2, AS A RADIATION MITIGATOR

Detcho A. Stoyanovsky,<sup>†\*</sup> Jianfei Jiang,<sup>†</sup> Michael P. Murphy,<sup>††</sup> Michael Epperly,<sup>§</sup> Song Li,<sup>#</sup> Joel Greenberger,<sup>§</sup> Valerian Kagan,<sup>†</sup> and Hülya Bayır.<sup>†\*</sup>

Departments of <sup>†</sup> Environmental and Occupational Health, <sup>‡</sup> Critical Care Medicine, <sup>§</sup> Radiation Oncology, and <sup>#</sup> Pharmaceutical Sciences, University of Pittsburgh, Pittsburgh, Pennsylvania 15260; <sup>††</sup> Medical Research Council, Mitochondrial Biology Unit, Wellcome Trust/MRC Bldg., Hills Rd, Cambridge, UK.

#### Organic synthesis

General information: Reagents and solvents were purchased from Sigma, Inc., and were used without further purification. 13S-hydroperoxy-9Z,11E-octadecadienoic acid was purchased from Cayman Chemical, Inc. HPLC separations were carried out with a Shimadzu chromatographic system equipped with an SPD-M10Avp photodiode detector. NMR spectra were obtained on a Bruker 300 MHz spectrometer. MS spectra were recorded on an LXQ ion trap mass spectrometer (ThermoFisher, San Jose, CA). Compound purity was determined by LC/MS and HPLC and carried out under the conditions listed below. All compounds reported herein were with purity  $\geq 95\%$  as measured in the wavelength range of 200 – 500 nm.

#### 2-[(2-carboxyphenyl)diselanyl]benzoic acid (7)

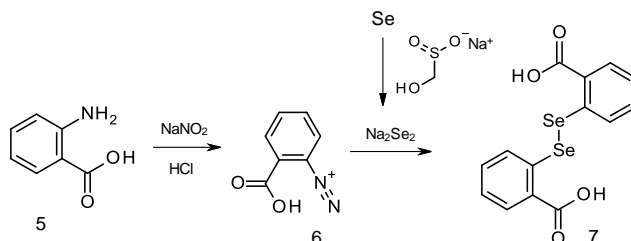

Na<sub>2</sub>Se<sub>2</sub> was prepared by stirring Se (100 mesh; 3.15 g; 40 mmol) in 20 % NaOH (35 mL) containing sodium hydroxymethanesulfonate (4.57 g; 40 mmol) for 2 hours at 40 – 45 °C. In parallel, 6 was prepared by treating a suspension of anthranilic acid (5.6 g; 40 mmol) in H<sub>2</sub>O (6 mL) with HCl (11 mL, 32 %; 98 mmol; t = 0 – 5 °C; dropwise addition of HCl over 1 hour). The resulting diazonium salt, kept at 0 – 4 °C, was added in small portions to the solution of Na<sub>2</sub>Se<sub>2</sub> (vigorous stirring) while keeping the temperature and the pH of the reaction solution under 10 °C and above 10, respectively. The final reaction solution was stirred for 2 hours at 25 °C and then the pH was decreased to 8.5. The solution was filtered and the filtrate stirred with active charcoal (1 g) for 1 hour at room temperature. After filtration of the charcoal, the pH of the filtrate was first adjusted to 5 – 5.5 with HCl (upward pH drift for ~ 20 min) and then to 4.2 – 4.5. The crystals formed were filtered and dissolved in water by titration of the solution with aqueous NaOH to pH 8.5. Then, the final solution was treated for a second time with charcoal. The pH-dependent precipitation of 7 was repeated and, after filtration, the product was dried in vacuum (20 mm Hg; 40 °C; yield, 5.1 g (63%)).

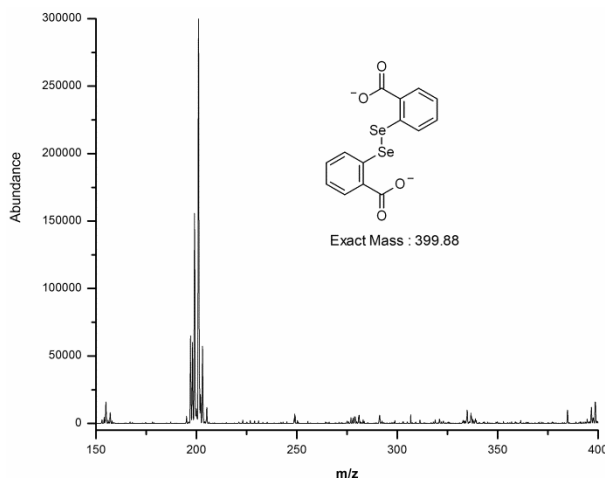

Figure 1S. MS analysis (negative ionization mode) of 7 (10  $\mu$ M) in 90 % methanol containing 1 % NH<sub>4</sub>OH.

### (2-chlorocarbonylphenyl) selenohypochlorite (**8**)

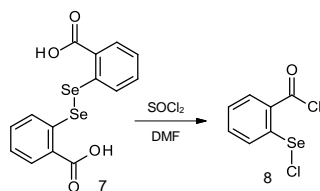

Diselenide **7** (1 g) was refluxed for 2 hours in  $\text{SOCl}_2$  (10 mL) containing DMF (0.5 mL). After evaporation of  $\text{SOCl}_2$  (20 mm Hg; 40 °C), the oily residue was extracted with hexane. The suspension was filtered and evaporation of the hexane extract afforded 1.2 g of **8** (Yield, 96 %; yellow crystals, m.p. 64-66 °C).<sup>1</sup>

### 2-[4-(3-oxo-1,2-benzoselenazol-2-yl)phenyl]acetic acid (**9**)

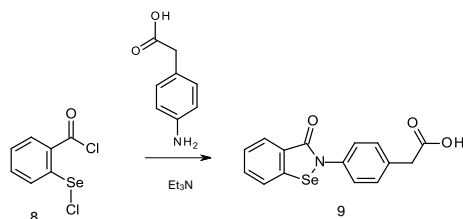

To a stirred solution of **8** (2.54 g; 10 mmol) in dry  $\text{CH}_3\text{CN}$  (50 mL; 0 - 4 °C) was added, over 1 hour,  $\text{CH}_3\text{CN}$  (20 mL) containing anthranilic acid (1.51 g; 10 mmol) and  $\text{Et}_3\text{N}$  (2 g; 20 mmol).<sup>2</sup> The reaction solution was further incubated at room temperature for 2 hour and then  $\text{CH}_3\text{CN}$  was rotor-evaporated. The dry residue was re-suspended in water and titrated with HCl (20 %) to pH 4.0. The resulting suspension was vigorously extracted with AcOEt (5 x 200 mL) and the organic extract dried over  $\text{Na}_2\text{SO}_4$ . After rotor-evaporation of AcOEt, recrystallization of the product from  $\text{CH}_3\text{CN}$  afforded 2.4 g of pure **9** (yield, 73 %).

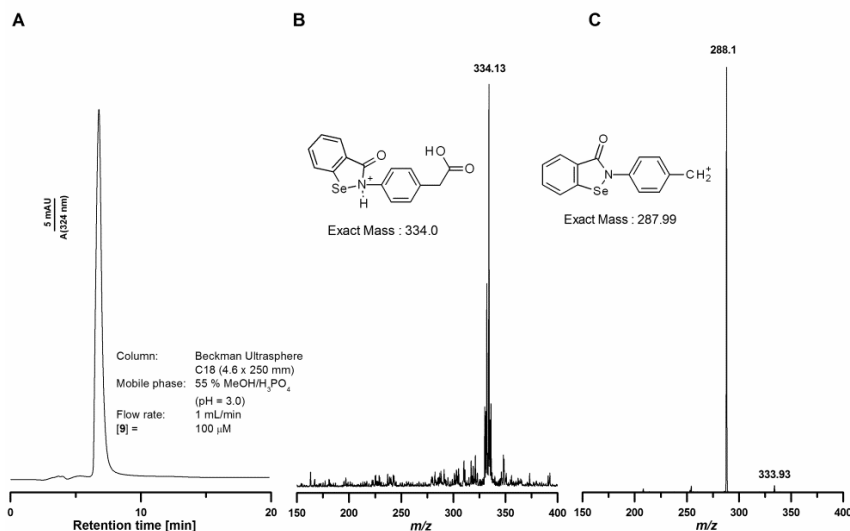

**Figure 2S.** HPLC (A), MS (B; (positive ionization mode)) and MS-MS (C) analysis of **9**. The analyte (A- 0.1 mM; B,C- 10  $\mu\text{M}$ ) was dissolved in methanol in the absence (A) or presence of trifluoroacetic acid (1%; B,C).

### 2-[[2-[4-(3-oxo-1,2-benzoselenazol-2-yl)phenyl]acetyl]amino]ethyl-triphenyl-phosphonium (**10**)

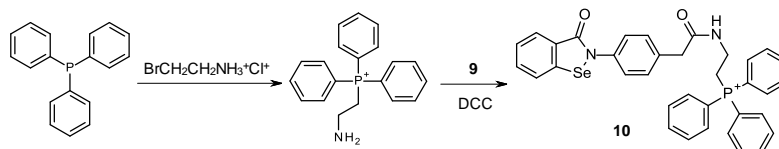

- A. 2-aminoethyl(triphenyl)phosphonium chloride was prepared by stirring and refluxing  $\text{Br-CH}_2\text{CH}_2\text{NH}_3^+\text{Cl}^-$  (7.81 g; 38.1 mmol) and  $\text{Ph}_3\text{P}$  (10 g; 38.1 mmol) in  $\text{CH}_3\text{CN}$  (50 mL) for 24 hours.<sup>3</sup> Thereafter, the solvent was rotor-evaporated, the remaining crystals were dissolved in minimal amount of  $\text{H}_2\text{O}$ , and the solution was titrated with concentrated NaOH to



C

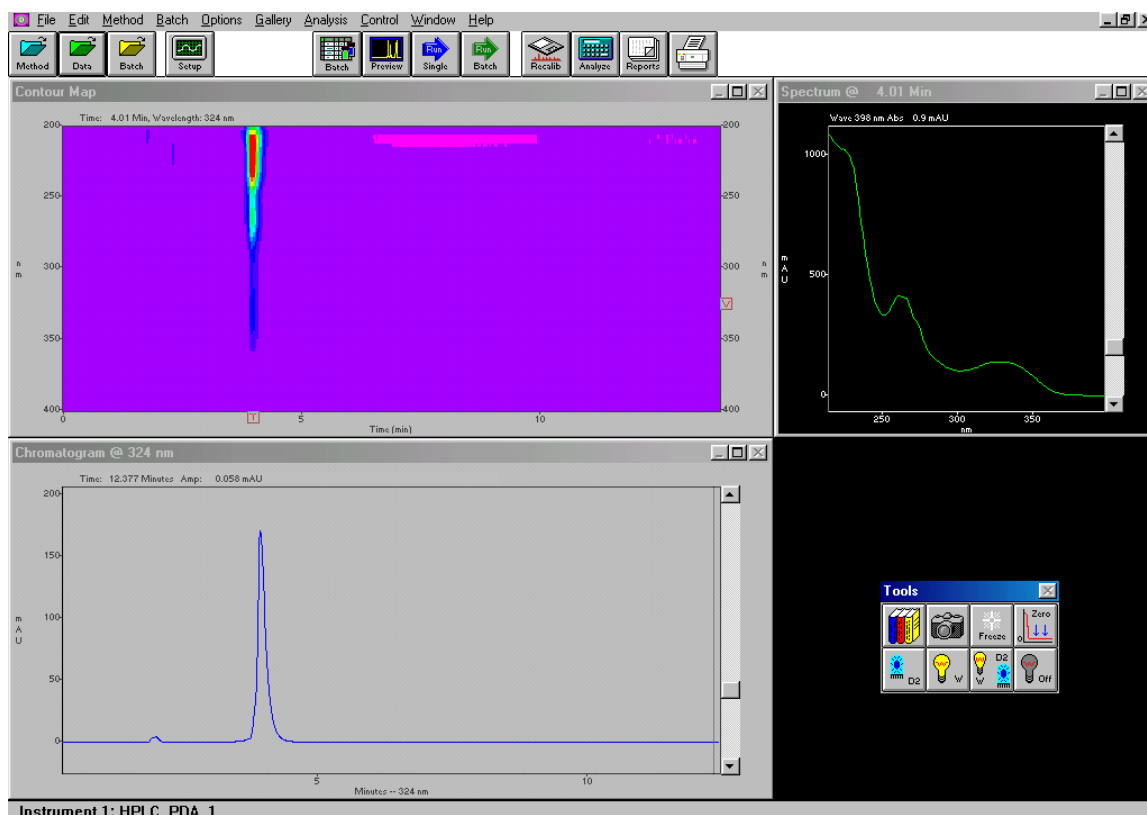

A

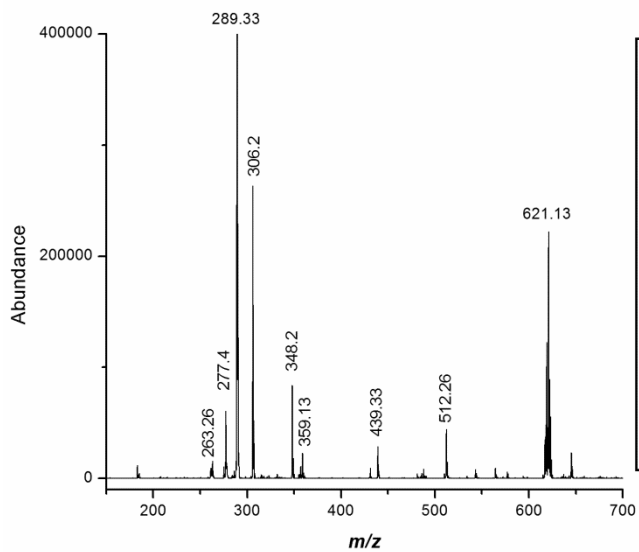

B

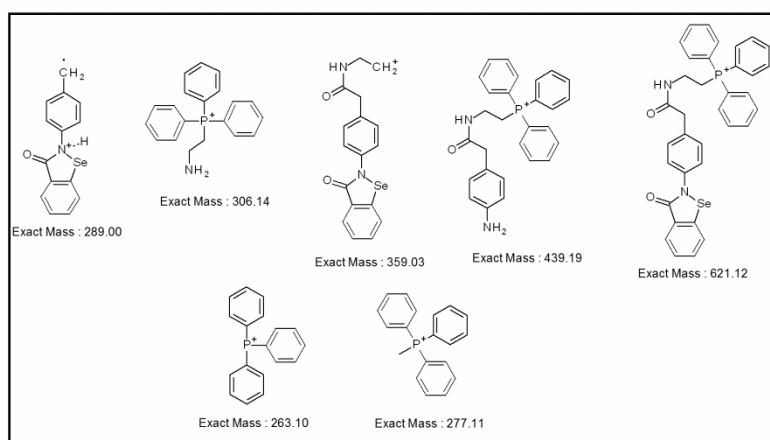

Figure 5S. MS-MS analysis of 10 (A) and structural assignment of the observed fragments (B).

**Figure 6S.** MS-MS analysis (negative ionization mode) of ROOH (A) and ROH (B) and structural assignment of the observed fragments (B,C). All spectra were recorded in negative ion mode.

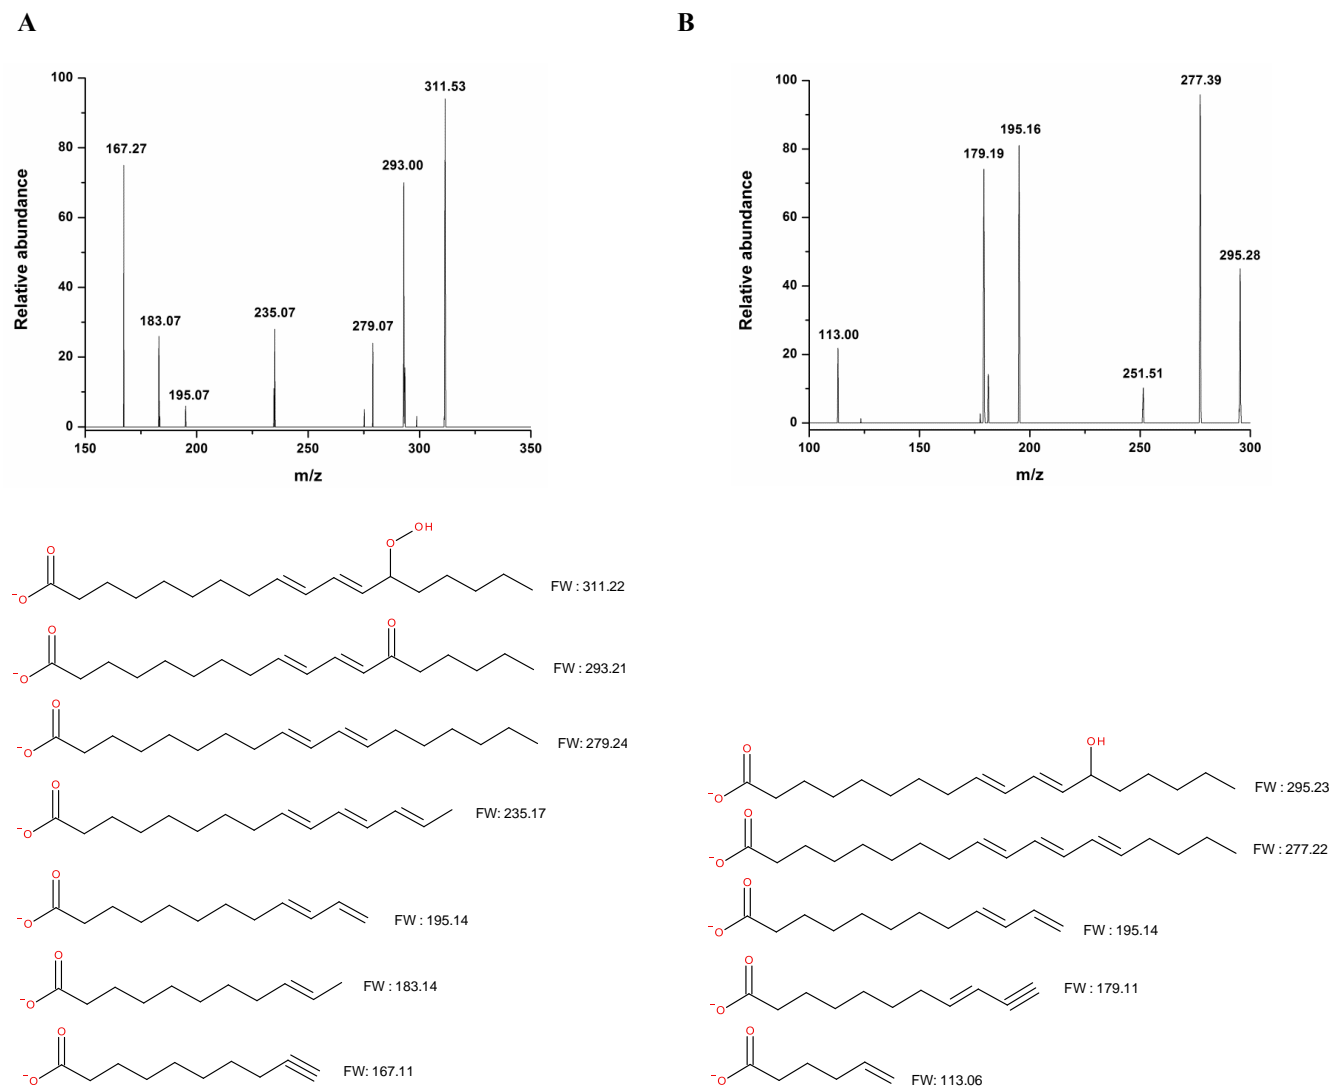

**Figure 7S.** MS analysis of the thiol-dependent reduction of hydroperoxides of CL by MitoPeroxidase 2. Reactions were carried out with CL-containing phosphatidylcholine (PC) liposomes for 30 min at 25 °C in 0.1 M Hepes (pH 7.4; 0.1 mM EDTA). Liposomes were obtained by sonication of phospholipids with ultra sound (10 x 5 sec; 30 seconds relaxation; ice bath), whereby PC, CL, cytochrome c and H<sub>2</sub>O<sub>2</sub> were used at concentrations of 100, 25, 2 and 50 μM, respectively. After completion of the incubation, CL was extracted from the reaction suspension following Folch's protocol (CHCl<sub>3</sub> : MeOH : H<sub>2</sub>O = 2 : 1 : 1), the solvent was evaporated under nitrogen, the dry residue redissolved in methanol and subjected to MS analysis prior to or after addition of 20 μM selanyl-benzamide (obtained by reduction of MitoPeroxidase with DHLA as indicate in Figure 1).

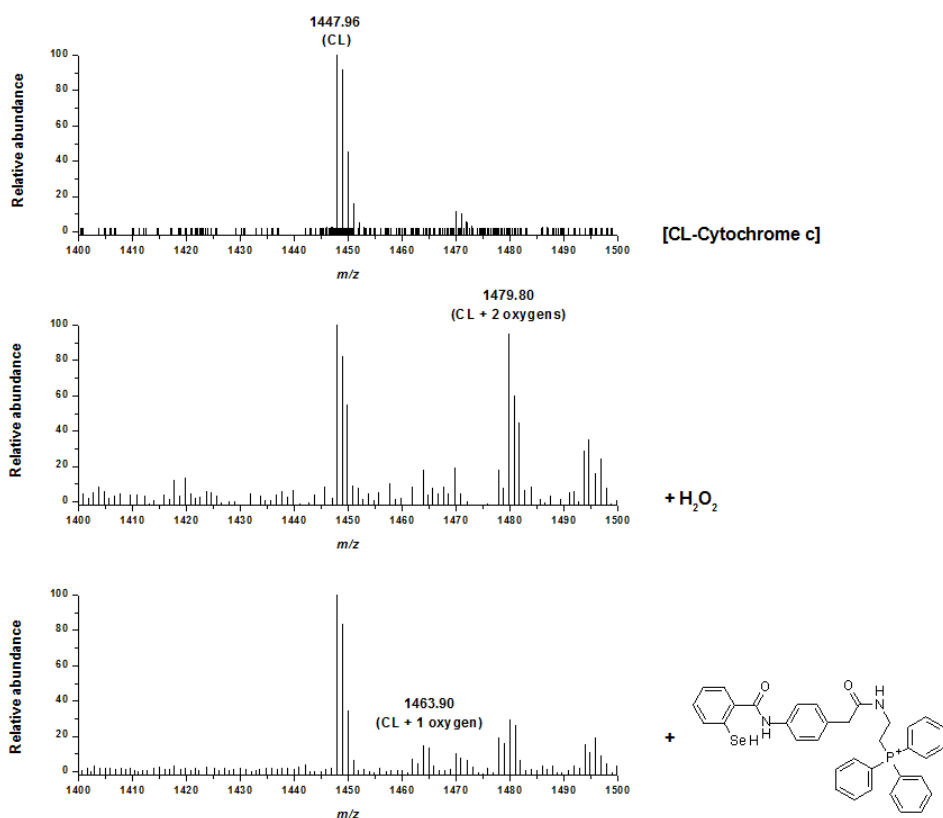

## Cell experiments

Mouse embryonic cells (courtesy of Dr. X. Wang, University of Texas, Dallas) were cultured in DMEM supplemented with 15% FBS, 25 mM HEPES, 50 mg/L uridine, 10 mg/L pyruvate, 2 mM glutamine, 1 × nonessential amino acids, 50  $\mu$ M  $\beta$ -mercaptoethanol,  $0.5 \times 10^6$  U/L mouse leukemia inhibitory factor, 100 U/L penicillin, and 100 mg/L streptomycin in a humidified atmosphere of 5%  $CO_2$ /95% air at 37°C. For radiation exposure, cells were  $\gamma$ -irradiated (10 Gy) using a Shepherd model 143-45A irradiator (J. L. Shepherd & Associates, CA) at a dose rate of  $\sim 4$  Gy/min. Ebselen and its derivatives were added to cells 30-min before or after  $\gamma$ -radiation exposure and removed after 4 hours of incubation. Cells were collected for further analysis after 48 hours post-radiation incubation.

**Phosphatidylserine (PS) externalization:** At the end of incubation, adherent cells were trypsinized and pooled with cells that had already been detached. The externalization of PS was determined by flow cytometry using an Annexin-V-FITC/Propidium iodide (PI) kit (Biovision, Mountain View, CA). Cell debris as represented by distinct low forward and side scatter were gated out for analysis. Ten thousand events were collected on a FACScanto II flow cytometer (Becton-Dickinson, Rutherford, NJ) equipped with Diva software. Percentages of Annexin V-positive cells were calculated by combining Annexin V+/PI- (early apoptotic) and Annexin V+/PI+ (late apoptotic or necrotic) cells.

**Statistical Analysis:** Data are expressed as means  $\pm$  standard deviation of at least triplicate determinations. Statistical analysis was performed by either paired or unpaired Student's  $t$ -test. Differences were considered significant (\*) at  $p < 0.05$ .

## Animal experiments

MitoPeroxidase 2 was loaded into an emulsion formulation (F14) that consisted of soy phosphatidylcholine, sesame seed oil and PEG2000-Fmoc2-OA2 (2:4:1 w/w) with a final drug concentration of 4 mg/ml in PBS. All ingredients were dissolved in chloroform and mixed well. The chloroform was then removed by nitrogen flow. The residual solvent was further removed under vacuum for 2 h. The oily residues were hydrated with PBS and sonicated in an ice bath for 30 min. The size of drug-loaded emulsion was  $\sim 100$  nm. The experiments were approved by the institutional Animal Care and Use Committee at the University of Pittsburgh.

C57BL/6NTac female mice were irradiated to 9.1 or 9.5 Gy total body irradiation. The mice were divided into two groups of 15 mice (irradiation only or MitoPeroxidase 2). Twenty four hours after irradiation the mice were injected IV with 100  $\mu$ l of MitoPeroxidase 2.

## References

- (1) Lesser, R.; Schoeller, A. Aromatic compounds containing selenium. IV. o-Selenocyanobenzoic acid. *Berichte der Deutschen Chemischen Gesellschaft* **1914**, 47, 1914.
- (2) Kamigata, N.; Iizuka, H.; Izuoka, A.; Kobayashi, M. Photochemical Reaction of 2-Aryl-1,2-benziselenazol-3(2H)-ones. *Bull. Chem. Soc. Japan* **1986**, 59, 1986.
- (3) Mavanoff, B. E.; Reitz, A. B.; Duhl-Emswiler, B. A. Stereochemistry of the Wittig Reaction. Effect of Nucleophilic Groups in the Phosphonium Ylide. *Journal of the American Chemical Society* **1984**, 107, 1984.
